# Supplementary material for: A new species of frog of the genus Noblella Barbour, 1930 (Amphibia: Strabomantidae) from the Cordillera del Cóndor, Ecuador
Source: PeerJ. 2024 Oct 2;12:e17939. doi: 10.7717/peerj.17939 (PMC11453160; doi:10.7717/peerj.17939)
Supplement: Table S1 [file peerj-12-17939-s001.xlsx]

## Sheet: Hoja1
Comparison of main characters of Noblella species
Species	Characters															Distribution	Source
	Snout-vent length	Snout	Tympanum	Finger IV phalanges	Finger tips	Toe tips	Nuptial pads	Upper eyelid tubercles	Ulnar tubercles	Heel tubercles	Dorsal skin	Ventral skin	Dorsal coloration in life	Suprainguinal marks	Venter and throat coloration in life
Noblella arutam sp. nov.	Males: 13.8–15.1 mm; Females: 17.3–20.3 mm	Subacuminate in dorsal view and rounded in profile	Tympanic annulus and membrane defined and visible externally	Three	Not expanded, acuminate, without papillae	Expanded and rounded distally, with a papillae	Absent	One or two inconspicuous tubercles	Present	One small subconical tubercle	Shagreen with scattered low tubercles more evident to the flanks	Smooth	Brown to gray with V-shaped inverted or scattered irregular darker marks. Incospicuous middorsal cream stripe present or not	Present	Yellow with white small blotches and minute dark brown dots	Cordillera del Cóndor, Zamora Chinchipe, Ecuador
N. carrascoicola	Holotype 14.5 mm	Subacuminate in dorsal view, angularly rounded in profile	Absent	Two	Slightly expanded	Hardly expanded	-	Absent	Not mentioned	Not mentioned	Smooth	Smooth	Grayish, brown, mostly uniform or with dark, irregular markings. Cream middorsal narrow stripe present or absent	Present or absent	Brown, finely flecked with beige. Fine midventral, beige line from vent to chin present or absent	Cochabamba and Santa Cruz Departments, Bolivia	De la Riva and Köhler, 1998; Duellman and Lehr, 2009
N. coloma	Males: 14.6 mm; Females: 16.0 mm	Rounded in dorsal view and profile	Tympanic annulus and membrane clearly visible and differentiated	Three	Not expanded distally, acuminate	Slightly expanded and acuminate distally	Not visible	Not mentioned	Absent	Not mentioned	Finely shagreen	Not mentioned	Uniform brown	Present	Bright orange	Pichincha Province, Ecuador	Guayasamin and Teran-Valdez, 2009
N. duellmani	Males: 18.5 mm; Females: 21.5 mm	Short, rounded in dorsal view and profile	Absent	Three	Slightly expanded	Slightly expanded and those of Toes III-V slightly acuminate distally	Unknown	Small tubercles	Coalesced into low fold	Absent	Pustulate	Smooth	Brown with tan mottling, a narrow dark brown postorbital stripe is present	Absent	Venter brown with tan mottling, throat cream with brownish orange mottling. Ventral surfaces have scattered small white flecks	Pasco Department, Peru	Lehr et al., 2004; Duellman and Lehr 2009
N. heyeri	Males: 12.9–14.1 mm; Females: 13.1–15.9 mm	Subacuminate in dorsal view, rounded in profile	Tympanic membrane and tympanic annulus distinct	Three	Slightly expanded	Slightly expanded, weakly acuminate distally	Absent	Absent	Distinct and round	Absent	Weakly pustulate	Pitted	Reddish brown with dark brown markings	Present	Brown with cream flecks	Southwestern Ecuador; Piura and Amazonas Deparments, Peru	Lynch, 1986; Duellman and Lehr 2009
N. lochites	Female: 14.9 mm	Short and truncated in dorsal and lateral view	Tympanum visible externally	Two	Swollen and pointed	Pointed without papilla	-	Absent	Absent	Absent	Finely shagreen with a few warts on flanks	Smooth	Gray to brown	Not mentioned	Dull gray	Cordillera del Cóndor, Morona Santiago, Ecuador	Lynch, 1976
N. losamigos	Males: 9.2–11.4 mm; Females: 9.7–13.6 mm	Short, rounded in dorsal view and bluntly rounded to subtruncate in profile	Tympanic annulus visible below skin, tympanic membrane evident	Two	Rounded, distally ending in papillae	Weakly acuminate distally and xpanded slightly in the digits II, III and IV. Toes II-V with a papillae	Absent	Minute tubercles	Absent	Absent	Smooth to finely shagreen	Smooth	Ocher gold to copper brown, with or without irregularly-shaped middorsal dark brown marks. A clear and slightly evident middorsal line present or not	Present	Black or clear gray with irregular white markings	Southeastern Peru	Santa Cruz et al. 2019
N. lynchi	Females: 16.2–20.2 mm	Subacuminate in dorsal view, rounded in profile	Tympanic membrane and tympanic annulus distinct	Three	Slightly expanded	Slightly expanded, weakly acuminate distally	Unknown	Absent	Coalesced into low fold	Absent	Pustulate	Smooth	Pale gray or tan with black markings	Present	Brown with fine cream flecks	Cordillera Central in northern Perú	Duellman , 1991; Duellman and Lehr, 2009
N. madreselva	Male: 15.6 mm; Female: 17.6 mm	Short, rounded in dorsal view and blunty rounded in profile	Tympanic membrane not differentiated, tympanic annnulus barely visible below skin	Three	Rounded	Not expanded, weakly acuminate distally	Absent	Minute tubercles	Small, round	Absent	Bearing small tubercles	Smooth to finely aerolate	Tan to dull brown with or without dark brown markings	Diffuse brown suprainguinal stripes	Black with large, irregularly shaped white mark	Province of La Convención, Cusco Region, Perú	Catenazzi et al. 2015
N. mindo	Males: 16.5–17.0 mm; Females: 18.3–19.5 mm	Rounded in dorsal and lateral views	Tympanic annulus and membrane visible externally	Three	Not expanded distally, rounded, without papillae	Slightly expanded and rounded distally, without papillae	Not visible	Absent	Diminutive and rounded	Not mentioned	Finely shagreen	Smooth	Uniform brown, cream middorsal, longitudinal line distinct	Present	Dark brown throat, yellowish-cream venter	Mindo, province of Pichincha, Ecuador	Reyes-Puig et al., 2021
N. myrmecoides	Females: 12.0–13.6 mm	Short and truncated in dorsal and lateral view	Tympanum visible externally	Two	No dilated into pads, with a papillae	Dilated pads and discs, tips with a papillae	Not mentioned	Absent	Absent, except for obscure antebrachial tubercle	Absent	Finely shagreen with scattered tubercles on flanks	Smooth	Cream, brown face and anterior flanks	Not mentioned	Brown and cream reticulations	Loreto Department, Perú	Lynch, 1976
N. naturetrekii	Males: 11.2–12.1 mm; Females: 13.1–14.4 mm	Elongated in dorsal view, rounded in profile	Tympanum membrane differentiated, tympanic annulus present	Two	Not expanded distally, acuminate without papillae	Pointed without papilla	Present	Flattened and rounded tubercles	Present	Not mentioned	Shagreen to tubercular, with scattered subconical tubercles on the sacral region	Finely granular	Light or dark brown	Present	Litght brown to brown interspersed with small white spots	Province of Pastaza, Ecuador	Reyes-Puig et al., 2019
N. personina	Males: 14.7–16.3 mm; Females: 15.6–17.9 mm	Rounded in dorsal view, subtruncate in profile	Tympanic membrane and tympanic annulus clearly visible	Three	Not expanded distally, acuminate	Slightly expanded and acuminate distally	Not visible	Not mentioned	Not mentioned	Not mentioned	Smooth with few low pustules most dense on posterior half of body	Not mentioned	Charcoal to brown with scattered darker marking and tiny cream spots	Absent	Pale to bright yellow with brown reticulation	Morona Santiago, Ecuador	Harvey et al., 2013
N. peruviana	Female: 16 mm	Short, rounded in dorsal and lateral views	Tympanic membrane not differentiated, tympanic annnulus visible below skin	Three	Not expanded	Not expanded, slightly acuminate of Toes III–V	Unknown	Absent	Absent	Absent	Finely shagreen	Smooth	Brown wit tan mottling	Present	Tan	Puno in southern Perú	Noble, 1921; Duellman and Lehr, 2009
N. pygmaea	Males: 10.3–11.1 mm; Females: 11.3–12.4 mm	Rounded in dorsal and lateral views	Tympanic membrane and Tympanic annulus present	Three	Rounded	Slightly pointed	Absent	Small tubercles	Present	A minute tubercle	Tubercular	Aerolate	Grayish brown	Absent	Grayish brown, paler than dorsum	Cusco in southern Perú	Lehr and Catenazzi, 2009
N. ritarasquinae	Female: 14.1 mm	Rounded in dorsal view, subacuminate in lateral view	Not visible	Two	Slightly expanded	Expanded pointed discs, with a papillae		Absent	Not mentioned	Not mentioned	Smooth	Smooth	Brown with two broad, pale, dorsolateral bands	Present	Throat and chest orange, venter reddish brown	Cochabamba Department, Bolivia	Köhler, 2000
N. thiuni	Male: 11.0 mm	Short, blunty rounded in dorsal and lateral views	Tympanic membrane not differentiated, tympanic annulus barely visible below skin	Three	Bulbous, not expanded laterally	Not expanded, weakly pointed	Absent	Absent	Absent	Absent	Finely shagreen	Smooth	Tan with a dark brown X-shaped middorsal mark and dark brown markings	Not differentiated	Throat brown, chest and belly copper reddish with a profusion of silvery spots	Puno Department, Perú	Catenazzi and Ttito, 2019
N. worleyae	Males: 15.5–17.9 mm; Females: 18.1–19.1 mm	Rounded in dorsal and lateral views	Tympanic annulus and membrane visible externally	Three	Not expanded distally, slightly acuminate to acuminate, without papillae	Slightly expanded and slightly acuminate, without papillae	Not visible	Not mentioned	Diminutive and rounded	Not mentioned	Finely shagreen	Not mentioned	Brown to dark brown, and densely splashed with light brown brownish gray or turquoise, with a middorsal line continuing the posterior lengths of hind legs cream to light brown	Absent	Yellowish-cream with minute speckling, throat with irregular brown to homogeneously brown marks	Manduriacu Reserva, Imbabura province, Ecuador	Reyes-Puig et al. 2020
