# Supplementary material for: A new species of frog of the genus Noblella Barbour, 1930 (Amphibia: Strabomantidae) from the Cordillera del Cóndor, Ecuador
Source: PeerJ. 2024 Oct 2;12:e17939. doi: 10.7717/peerj.17939 (PMC11453160; doi:10.7717/peerj.17939)
Supplement: Table S2 [file peerj-12-17939-s002.xlsx]

## Sheet: Hoja1
Morphological measurements of the type series of Noblella arutam sp. nov.
Museum	Code	Sex	Estatus	SVL (snout-vent length)	HL (head length)	HW (head width)	ED (eye diameter)	EN (eye-nostril distance)	TD (tympanum diameter)	MIOD (minimum interorbital distance)	MEW (minimum eyelid width)	HaL (hand length)	SL (shank length)	FL (foot length)
ZSFQ	1882	Female	Adult	20.34	6.9	6.9	2.48	1.32	1.48	2.72	1.56	4.13	9.57	9.56
ZSFQ	1875	Female	Adult	17.25	5.76	5.87	2.18	1.31	1.24	2.62	1.48	3.75	8.79	8.99
ZSFQ	6231	Female	Adult	20.03	6.78	6.67	2.51	1.61	1.31	2.52	1.55	4.04	9.19	9.71
ZSFQ	6232	Female	Adult	17.4	6.11	5.89	2.1	1.33	1.13	2.15	1.43	3.63	8.55	8.57
ZSFQ	6233	Female	Adult	18.52	6.81	6.53	2.28	1.45	1.26	2.63	1.59	3.84	8.73	8.76
ZSFQ	6234	Female	Adult	17.95	6.44	5.98	2.15	1.32	1.11	2.39	1.49	3.73	9.1	9.05
ZSFQ	1189	Male	Adult	14.76	5.08	5.4	1.91	1.14	0.97	2.14	1.43	3.04	7.56	7.38
ZSFQ	1885	Male	Adult	13.84	4.27	4.45	1.71	1.03	0.86	1.75	1.12	2.58	6.08	5.98
ZSFQ	6235	Male	Adult	14.52	5.02	4.84	1.93	1.17	0.99	1.69	1.23	2.77	6.9	6.95
ZSFQ	6236	Male	Adult	14.29	4.8	4.38	1.97	1	0.94	2.1	1.27	2.74	6.77	6.41
ZSFQ	6238	Male	Adult	14.6	5.28	4.66	1.74	1.1	0.96	2.37	1.29	3.1	7.23	7.07
ZSFQ	6240	Male	Adult	14.32	5.22	4.72	1.76	0.99	0.89	2.44	1.03	3.12	7.32	7.39
ZSFQ	6241	Male	Adult	15.1	5.07	4.91	1.91	1.26	1	2.54	1.42	2.93	7.36	7.33
ZSFQ	1886	Male	Adult	15.08	4.47	5.41	1.96	0.91	0.76	1.97	1.08	2.76	7.45	6.42
